# Supplementary material
Source: publisher figshare collection journal article supplement (https://sage.figshare.com/ndownloader/files/14746619)
Supplement: Supplementary file 1 [file 14746619]

# Scattering Angle Resolved Optical Coherence Tomography of a Hypoxic Mouse Retina Model: Supplementary Material

## Burr Distribution

The Burr Type XII distribution is a generalization of the Pareto and Weibull distributions and was first described by Singh and Maddala<sup>1</sup> who utilized it to investigate income distributions. The Burr distribution has also been utilized in diverse fields such as failure analysis,<sup>2</sup> forestry (tree diameter),<sup>3</sup> and behavioral science (travel time reliability).<sup>4</sup>

The Burr distribution's probability density function is given by Equation 2:

$$PDF_{Burr}(x|\alpha, C, K) = \frac{\frac{KC}{\alpha} \left(\frac{x}{\alpha}\right)^{C-1}}{1 + \left(\frac{x}{\alpha}\right)^C}, \quad (2)$$

where  $\alpha$  is a scale parameter to the sample value, C and K are shape parameters, and x is the sample value. Influence of  $\alpha$ , C, and K parameters are illustrated (Figure S1).

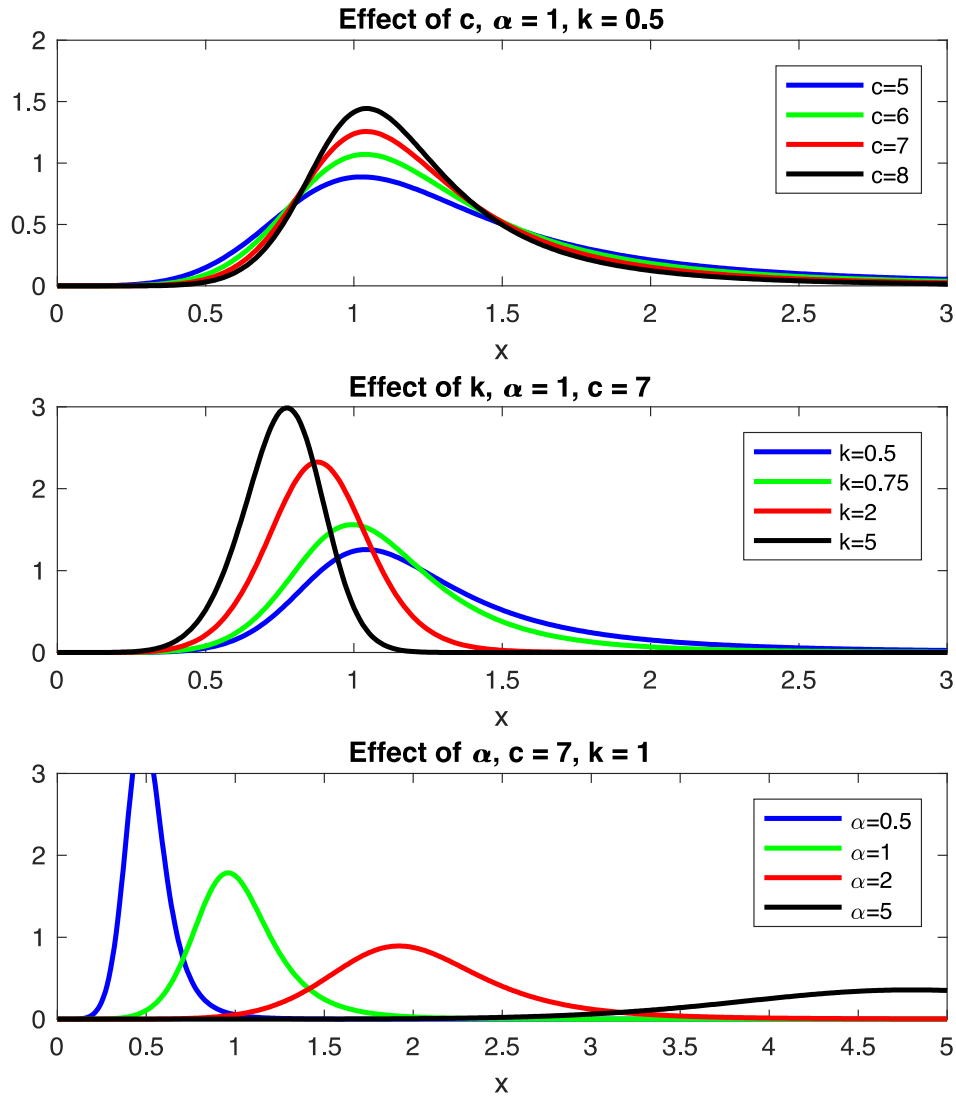

**Figure S1.** C and K parameters control Burr Type XII distribution shape while  $\alpha$  is a scale parameter in the x-dimension.

To demonstrate goodness of fit of L/H<sub>2</sub> values to a Burr distribution, the L/H<sub>2</sub> values were taken from the segmented inner nuclear layer (INL) of a mouse retina was chosen as a representative retinal volume. L/H<sub>2</sub> values in the segmented INL were fit to a Burr distribution. Resulting confidence intervals for the Burr distribution parameters (C, K, and  $\alpha$ ) were extremely tight. The  $\alpha$  parameter was calculated to be 1.069 (confidence interval: [1.068, 1.071]), C parameter as 5.315 (confidence interval: [5.303, 5.327]), and K parameter as 0.972 (confidence interval: [0.967, 0.977]). Thus, a 95% confidence exists that the actual distribution falls with 0.16%

of  $\alpha$ , 0.23% of C, and 0.55% of K. Considering a Burr distribution for every retinal layer in a control mouse, on average a 95% confidence exists that the actual distribution falls within 0.43% of  $\alpha$ , 0.58% of C, and 1.58% of K (Figure S2).

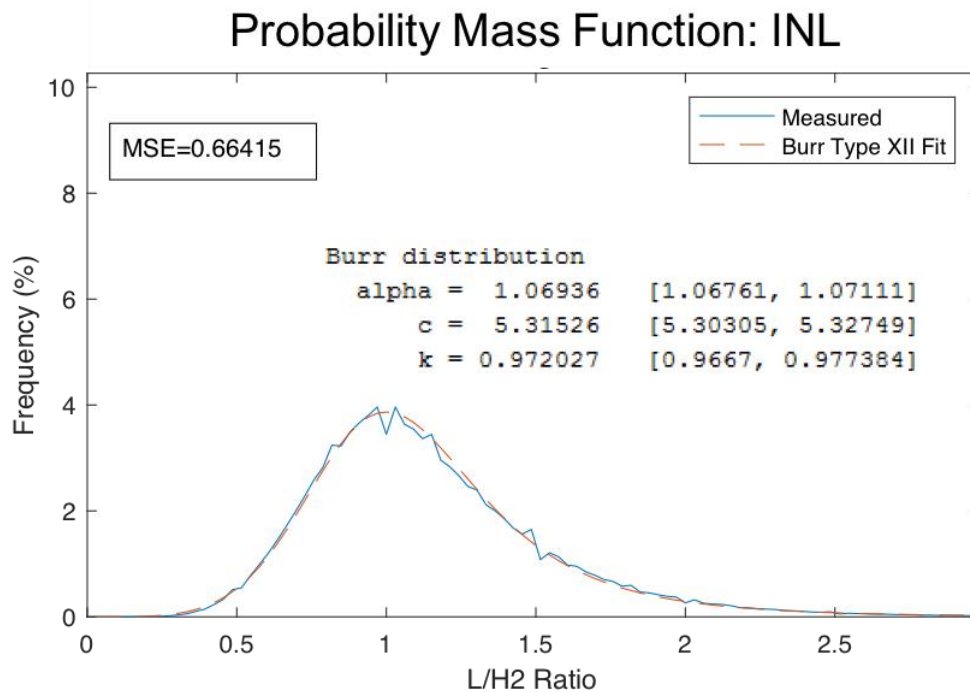

**Figure S2.** The probability mass function for the INL is displayed with the Burr distribution fit. The burr distribution is an excellent fit for L/H2 values.

## References

1. Singh SK, Maddala GS. A function for size distribution of incomes. In: *Modeling Income Distributions and Lorenz Curves*. Springer; 2008:27-35.
2. Zimmer WJ, Keats JB, Wang FK. The Burr XII distribution in reliability analysis. *J Qual Technol*. 1998;30(4):386.
3. Lindsay SR, Wood GR, Woollons RC. Modelling the diameter distribution of forest stands using the Burr distribution. *J Appl Stat*. 1996;23(6):609-620.
4. Taylor MAP. Modelling travel time reliability with the Burr distribution. *Procedia-Social Behav Sci*. 2012;54:75-83.
